# Supplementary material for: Structure and electronic properties of an asymmetric thiolate-bridged binuclear complex: a model for the active site of acetyl CoA synthase
Source: Royal Society of Chemistry journal article supplement (doi:10.1039/b310183e), 2003-01-01
Supplement: b310183e.doc [file b310183e.doc]

**Supporting Information for Wang et al. "Structure and Electronic Properties of an Asymmetric Thiolate-bridged Binuclear Ni-Ni Complex: a Model for the Active Site of Acetyl CoA Synthase"**

**Materials and Methods.** All manipulations, reactions and transfers of samples were conducted under pure argon or N2 atmospheres using standard Schlenk techniques. All solvents were pre-dried and refluxed under N2 over suitable drying agents.

**Synthesis and characterisation of [(dppe)Ni(**-‘*S*,*S*’)Ni(L)](PF6)2:**

H2L (*N*,*N*’-diethyl-3,7-diazanonane-1,9-dithiol) was prepared according to a literature method,1 and [Ni(L)] was synthesised via a modification to the literature methods.1,2

A mixture of [NiCl2(dppe)] (122mg, 0.23mmol) and NH4PF6 (83mg, 0.51mmol) in MeCN (12 cm3) was stirred for 5 h at room temperature. To the suspension was added [Ni(L)] (71mg, 0.23mmol), and the mixture was stirred for an additional 5 h. The red solution was filtered and an orange-red solid powder was obtained upon the removal of MeCN in *vacuo*. The solid was extracted into CH2Cl2 followed by removal of CH2Cl2 from the filtrate in *vacuo*, affording a red solid powder which was recrystallised by adding Et2O to a concentrated solution of the product in CH3CN. A red crystalline precipitate was obtained and was washed with Et2O and dried in *vacuo*. Yield, 0.19g, 80%. Found: C, 42.32; H, 4.49; N, 2.61%. Calc. For C37H48F12N2Ni2P4S2: C, 42.16; H, 4.59; N, 2.66%. FAB MS: *m/z* 762 (M-2PF6-)+, 909 (M-PF6-)+. 1H NMR (300.13 MHz, CD2Cl2, 298K), : 0.65-3.45 (28H, m, alkyl-H), 7.52-7.97 (20H,m, Ph-H); 31P{1H} NMR (121.5MHz, CD2Cl2, 298K), : 61.09 (s, dppe-P); -142.84 (septet, *J*F-P = 713Hz, PF6-); 13C{1H} NMR (75.47MHz, CD2Cl2, 298K) c: Ph-C (134.16, 133.29, 131.38, 130.73), alkyl-C: 63.30, 48.53, 29.45, 25.30, 23.30 and 6.75. IR (KBr disc): 3058w, 2986(m), 1478m, 1438s, 1387m, 1298w, 1263w, 1193w, 1103m, 999m, 975w, 838vs(br), 749m, 717m, 693s, 656w, 558s, 531s, 485m, 438w cm-1. Red plate crystals suitable for X-ray diffraction study were obtained by solvent evaporation from a solution of the complex in CHCl3 at room temperature.

**Electrochemistry:**

Electrochemical measurements were made using an Autolab PGSTAT20 potentiostat. All complex solutions were purged with a stream of dry argon gas prior to use. Cyclic voltammetry was performed using a three-electrode system, with a glassy carbon working electrode, a Pt wire secondary electrode, and a saturated calomel reference electrode. The [Fe(Cp2)]+/[Fe(Cp2)] couple was used as an internal standard. The cyclic voltammograms were recorded for solutions of compound (ca. 1 mmol dm-3) (in CH2Cl2)with [nBuN]4[BF4] (0.4 mol dm-3)as supporting electrolyte. Controlled potential electrolysis measurements were performed with a two-compartment cell using a Pt/Rh gauze basket working electrode, a Pt/Rh gauze secondary electrode, and a saturated calomel reference electrode.

X-band EPR spectra were recorded on a Bruker EMX spectrometer and the simulations of the EPR spectra were performed using in-house software.3

The UV/vis spectroelectrochemical experiments were carried out at 273K with an optically transparent electrode mounted in a modified quartz cuvette with an optical pathlength of 0.5 mm. A three-electrode configuration consisting a Pt/Rh gauze working electrode, a Pt wire secondary electrode (in a fritted PTFE sleeve) and a saturated calomel electrode, chemically isolated from the test solution *via* a bridge tube containing electrolyte solution and terminated in a porous frit, was used in the cell. The potential at the working electrode was controlled by a Sycopel Scientific Ltd. DD10M potentiostat. The UV/vis spectra were recorded on a Perkin Elmer Lambda 16 spectrophotometer. The spectrometer cavity was purged with N2 and temperature control at the sample was achieved by flowing cooled N2 across the surface of the cell.

(1) F. Osterloh, W. Saak and S. Pohl, *J. Am. Chem. Soc.* 1997, **119**, 5648-5656.

(2) J. Schneider, R. Hauptmann, F. Osterloh and G. Henkel, *Acta Crystallogr. Sect. C-Cryst. Struct. Commun.,* 1999, **55**, 328-330.

(3) F. E. Mabbs and D. Collison, *Electron Paramagnetic Resonance of d-Transition Metal Compounds*; Elsevier, Amsterdam, 1992.


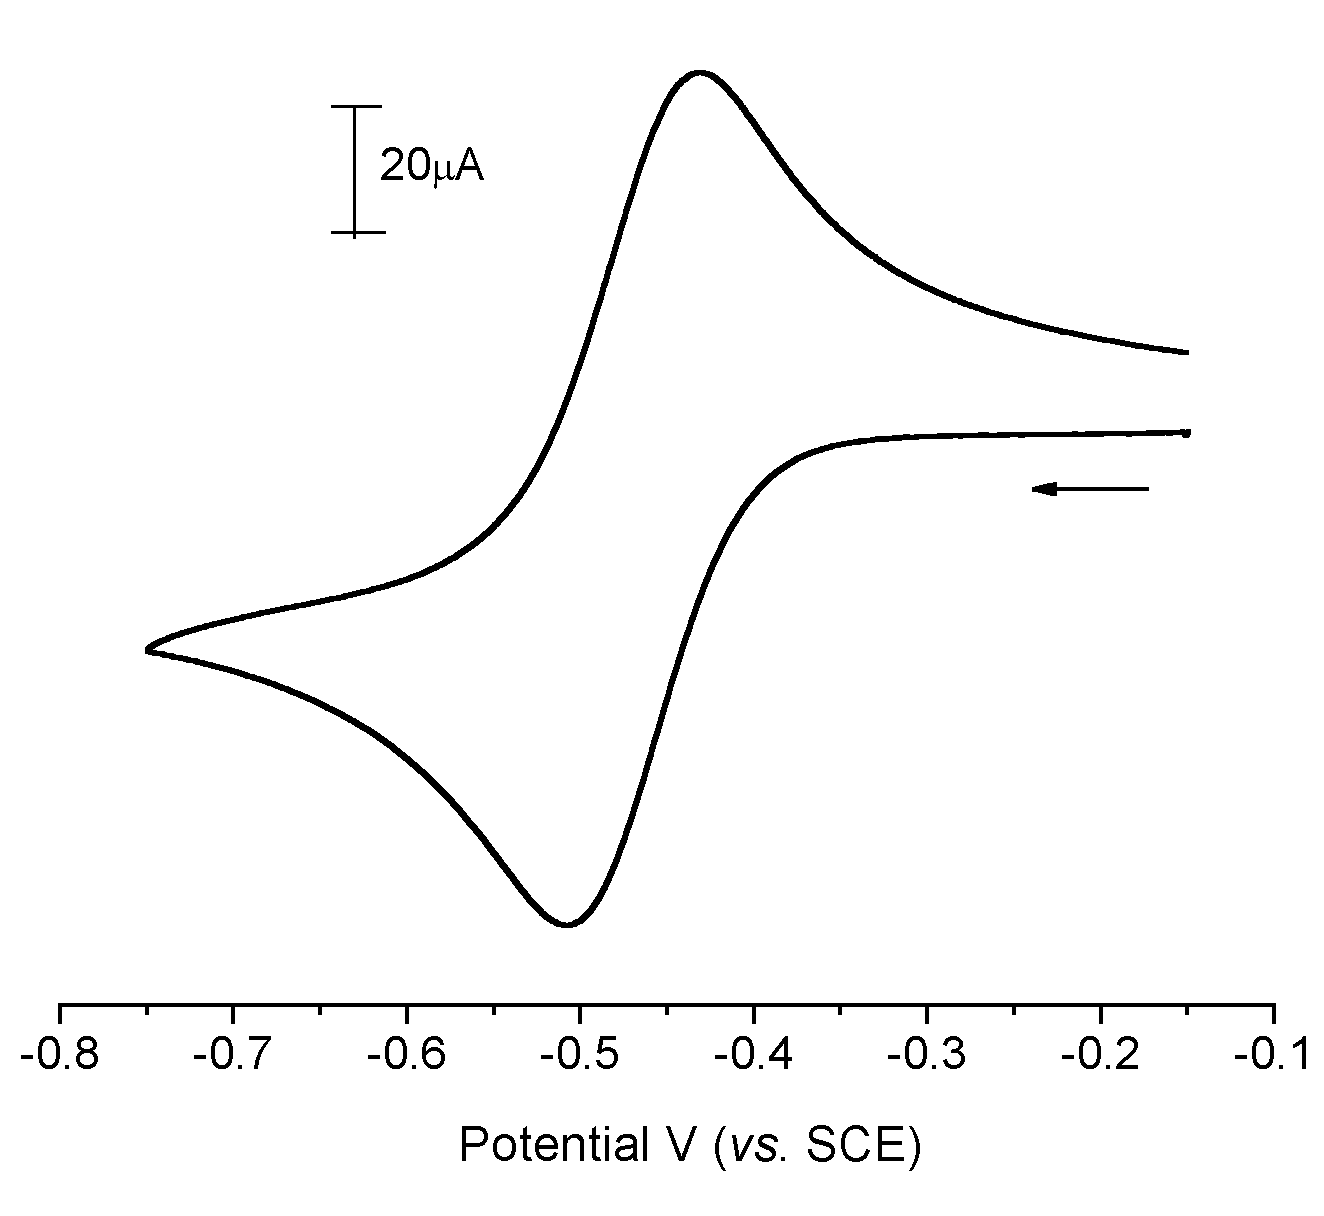


**Fig.1** Cyclic voltammogram of 1 mM solution of [(dppe)Ni(**-‘*S*,*S*’)Ni(L)](PF6)2 in 0.4 M [nBu4N][BF4]/CH2Cl2 (*vs*. SCE), at 100 mV/s and 293 K.


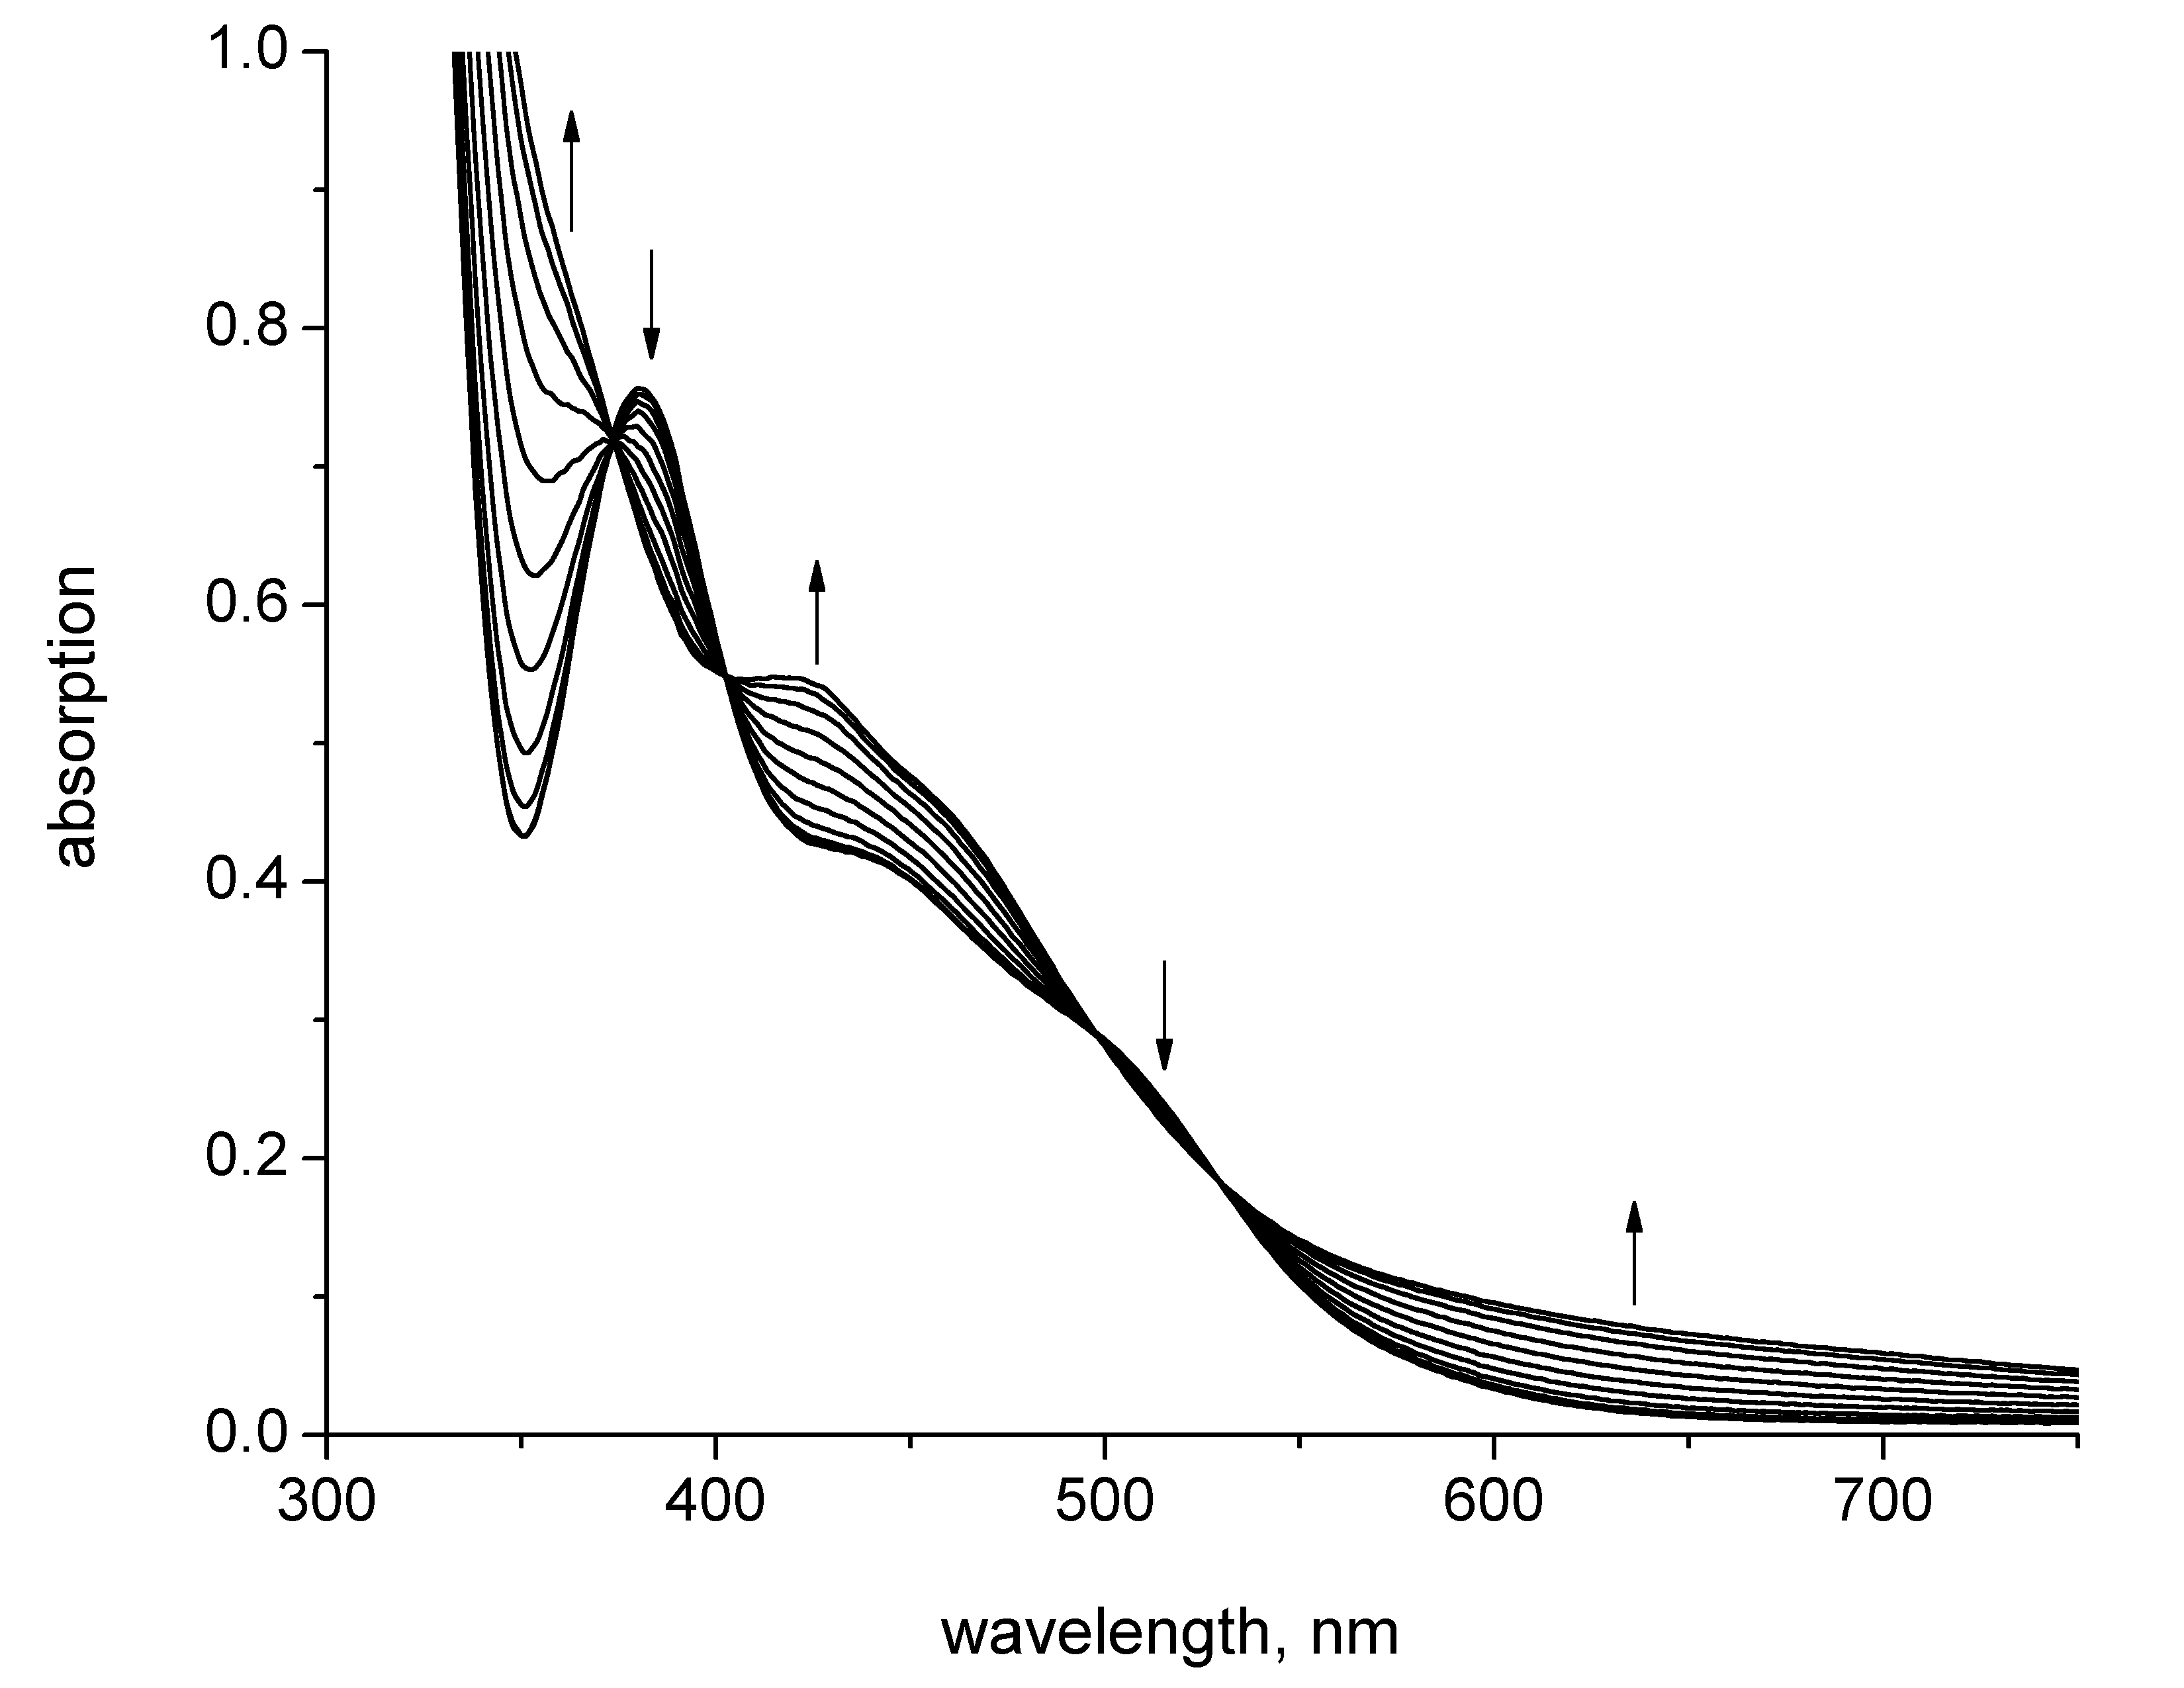


**Fig.2** Electronic spectra observed during the one-electron reduction of [(dppe)Ni(**-‘*S*,*S*’)Ni(L)](PF6)2 at 273 K in CH2Cl2 containing 0.4 M [nBu4N][BF4].
